# Supplementary material for: Low-dose CT for diagnosing intestinal obstruction and pneumoperitoneum; need for retakes and diagnostic accuracy
Source: PubMed Central journal article supplement — Acta Radiol Open. 2021 Mar 11;10(3):2058460121989313. doi: 10.1177/2058460121989313 (PMC7958640; doi:10.1177/2058460121989313), 2021-03-11
Supplement: sj-pdf-1-arr-10.1177_2058460121989313.pdf [file sj-pdf-1-arr-10.1177_2058460121989313.pdf]

## Supplemental Material

**Table 1.** Diagnosis codes from ICD-10 [14] including intestinal obstruction or pneumoperitoneum.

Local sub-diagnoses are also included

Diagnosis codes including intestinal obstruction:

1. K40.0 Bilateral inguinal hernia, with obstruction, without gangrene
2. K40.3 Unilateral inguinal hernia, with obstruction, without gangrene
3. K41.0 Bilateral femoral hernia, with obstruction, without gangrene
4. K41.3 Unilateral or unspecified femoral hernia, with obstruction, without gangrene
5. K42.0 Umbilical hernia with obstruction, without gangrene
6. K43.0 Incisional hernia with obstruction, without gangrene
7. K43.3 Parastomal hernia with obstruction, without gangrene
8. K43.6 Other and unspecified ventral hernia with obstruction without gangrene
9. K44.0 Diaphragmatic hernia with obstruction, without gangrene
10. K45.0 Other specified abdominal hernia with obstruction, without gangrene
11. K46.0 Unspecified abdominal hernia with obstruction, without gangrene
12. K56.0 Paralytic ileus
13. K56.5 Intestinal adhesions (bands) with obstruction
14. K56.6 Other and unspecified intestinal obstruction
15. K56.7 Ileus, unspecified
16. K91.3 Postoperative intestinal obstruction.

Diagnosis codes including gastrointestinal perforation:

1. K22.3 Perforation of oesophagus
2. K25.1 Gastric ulcer; acute with perforation
3. K25.2 Gastric ulcer; acute with both haemorrhage and perforation
4. K25.5 Gastric ulcer; chronic or unspecified with perforation
5. K25.6 Gastric ulcer; chronic or unspecified with both perforation and haemorrhage
6. K26.1 Duodenal ulcer; acute with perforation
7. K26.2 Duodenal ulcer; acute with both haemorrhage and perforation
8. K26.5 Duodenal ulcer; chronic or unspecified with perforation
9. K26.6 Duodenal ulcer; chronic or unspecified with both haemorrhage and perforation
10. K27.1 Peptic ulcer, site unspecified; acute with perforation
11. K27.2 Peptic ulcer, site unspecified; acute with both haemorrhage and perforation

12. K27.5 Peptic ulcer, site unspecified; chronic or unspecified with perforation
13. K27.6 Peptic ulcer, site unspecified; chronic or unspecified with both haemorrhage and perforation
14. K28.1 Gastrojejunal ulcer; acute with perforation
15. K28.2 Gastrojejunal ulcer; acute with both haemorrhage and perforation
16. K28.5 Gastrojejunal ulcer; chronic or unspecified with perforation
17. K28.6 Gastrojejunal ulcer; chronic or unspecified with both haemorrhage and perforation
18. K57.0 Diverticular disease of small intestine with perforation and abscess
19. K57.2 Diverticular disease of large intestine with perforation and abscess
20. K57.4 Diverticular disease of both small and large intestine with perforation or abscess
21. K57.8 Diverticular disease of intestine, part unspecified, with perforation or abscess
22. K62.8 Other specified diseases of anus and rectum
23. K63.1 Perforation of intestine (nontraumatic)
24. K82.2 Perforation of gallbladder
25. K83.2 Perforation of bile duct
26. S36.3 Injury of stomach
27. S36.4 Injury of small intestine
28. S36.5 Injury of colon
29. S36.6 Injury of rectum
30. T81.3 Disruption of operation wound, not classified elsewhere.
